# Supplementary material for: Guideline‐Recommended Therapies and Clinical Outcomes According to the Risk for Recurrent Cardiovascular Events After an Acute Coronary Syndrome
Source: PubMed Central journal article supplement — J Am Heart Assoc. 2018 Sep 8;7(18):e009885. doi: 10.1161/JAHA.118.009885 (PMC6222928; doi:10.1161/jaha.118.009885), 2018-09-08
Supplement: JAH3-7-e009885-s001.pdf [file JAH3-7-e009885-s001.pdf]

# **SUPPLEMENTAL MATERIAL**

**Table S1. Temporal trends in clinical outcomes in patients who survived the index ACS hospitalization.**

|                          | <b>2008</b> | <b>2010</b> | <b>2013</b> | <b>2016</b> | <b>P trend</b> |
|--------------------------|-------------|-------------|-------------|-------------|----------------|
| <b>Entire cohort</b>     |             |             |             |             |                |
| N                        | 1673        | 1686        | 1632        | 1695        |                |
| 30 day MACE              | 172 (10.3)  | 139 ( 8.2)  | 144 ( 8.8)  | 123 ( 7.3)  | 0.006          |
| 30 day mortality         | 29 ( 1.7)   | 34 ( 2.0)   | 29 ( 1.8)   | 23 ( 1.4)   | 0.334          |
| 1 year mortality         | 92 ( 5.6)   | 99 ( 5.9)   | 103 ( 6.4)  | 103 ( 6.2)  | 0.387          |
| <b>Low-risk</b>          |             |             |             |             |                |
| N                        | 639         | 597         | 566         | 605         |                |
| 30 day MACE              | 39 ( 6.1)   | 34 ( 5.7)   | 43 ( 7.6)   | 46 ( 7.6)   | 0.1            |
| 30 day mortality         | 5 ( 0.8)    | 2 ( 0.3)    | 3 ( 0.5)    | 5 ( 0.8)    | 0.8            |
| 1 year mortality         | 6 ( 1.0)    | 7 ( 1.2)    | 11 ( 2.0)   | 10 ( 1.7)   | 0.1            |
| <b>Intermediate-risk</b> |             |             |             |             |                |
| N                        | 429         | 457         | 433         | 453         |                |
| 30 day MACE              | 35 ( 8.2)   | 31 ( 6.8)   | 36 ( 8.3)   | 28 ( 6.2)   | 0.4            |
| 30 day mortality         | 4 ( 0.9)    | 3 ( 0.7)    | 6 ( 1.4)    | 5 ( 1.1)    | 0.5            |
| 1 year mortality         | 13 ( 3.1)   | 15 ( 3.3)   | 20 ( 4.7)   | 16 ( 3.6)   | 0.4            |
| <b>High-risk</b>         |             |             |             |             |                |
| N                        | 605         | 632         | 633         | 637         |                |
| 30 day MACE              | 98 (16.2)   | 74 (11.7)   | 65 (10.3)   | 49 ( 7.7)   | <0.001         |
| 30 day mortality         | 20 ( 3.3)   | 29 ( 4.6)   | 20 ( 3.2)   | 13 ( 2.1)   | 0.1            |
| 1 year mortality         | 73 (12.1)   | 77 (12.2)   | 72 (11.6)   | 77 (12.3)   | 0.9            |

Values are presented as n (%).

DAPT: Dual antiplatelet therapy; MACE: Death/Unstable angina pectoris/MI/CVA/Stent thrombosis/Urgent revascularization.
